# Supplementary material for: Tissue-specific Co-expression of Long Non-coding and Coding RNAs Associated with Breast Cancer
Source: PubMed Central journal article supplement (PMC5011741; doi:10.1038/srep32731), 2016-09-06
Supplement: srep32731-s1.pdf [file srep32731-s1.pdf]

# **Tissue-specific Co-expression of Long Non-coding and Coding RNAs Associated with Breast Cancer**

Wenting Wu<sup>1\*</sup>, Erin K. Wagner<sup>1\*</sup>, Yangyang Hao<sup>2</sup>, Xi Rao<sup>2</sup>, Hongji Dai<sup>1,3</sup>, Jiali Han<sup>1,4,5</sup>,  
Jinhui Chen<sup>6</sup>, Anna Maria V. Storniolo<sup>7</sup>, Yunlong Liu<sup>2,8</sup>, Chunyan He<sup>1,4,8</sup>

## **Supplementary Notes**

### **Supplementary Figures Legends**

**Supplementary Figure S1. Unsupervised principal components analysis (PCA) of expressed transcripts in tumors and normal breast tissue.** Tumor from breast cancer patients was indicated in red and normal breast tissue from healthy women was indicated in green. Scatter plots of principal components (PCs) for a) lncRNAs; and b) mRNAs; respectively.

**Supplementary Figure S2. Volcano plots of the differential expression analysis in tumor and normal breast tissue.** a) lncRNAs; and b) mRNAs. Vertical dotted lines denote fold change =  $\pm 2$  horizontal dotted line denote the FDR  $P$ -value = 0.01.

**Supplementary Figure S3. Summary results for lncRNA *RP11-118E18.2* from TCGA BRCA dataset in TANRIC.** a) Correlation analysis of the lncRNA expression level and ER status; b) correlation analysis of the lncRNA expression level and PR status; c) correlation analysis of the lncRNA expression level and PAM50; d) correlation

analysis of the lncRNA expression level and breast cancer therapy based molecular signatures; e) correlation analysis of the lncRNA expression level and *P53* mutation status.

**Supplementary Figure S4: Functional enrichment for the mRNAs identified from differential expression analysis in our data.**

**Supplementary Figure S5: Ingenuity pathway analysis (IPA) of mRNAs that were differentially co-expressed with lncRNA *AC145110.1*.** Green color represents down-regulated genes in breast tumor tissue, red color represents up-regulated genes in breast tumor tissue in our study.

**Supplementary Figure S6: Summary results for lncRNA *AC145110.1* from TCGA BRCA dataset in TANRIC.** a) Correlation analysis of the lncRNA expression level and disease stage; b) correlation analysis of the lncRNA expression level and ER status; c) correlation analysis of the lncRNA expression level and HER2 status; d) correlation analysis of the lncRNA expression level and PAM50; e) correlation analysis of the lncRNA expression level and breast cancer therapy based molecular signatures; f) correlation analysis of the lncRNA expression level and *XIRP2* mutation status.

**Supplementary Figure S7: Venn Diagram of lncRNAs overlaps among differential expression, differential co-expression, and dose-response co-expression analyses.**

**Supplementary Tables (please refer to the separate excel documents).**

**a**

Normal  
Tumor

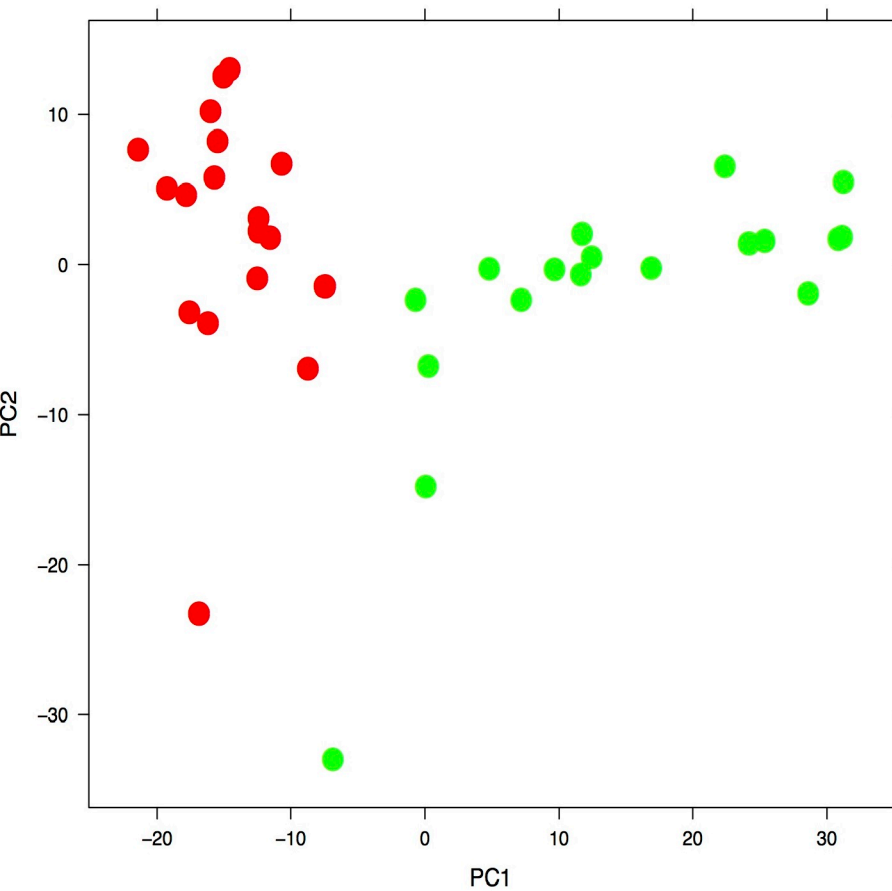**b**

Normal  
Tumor

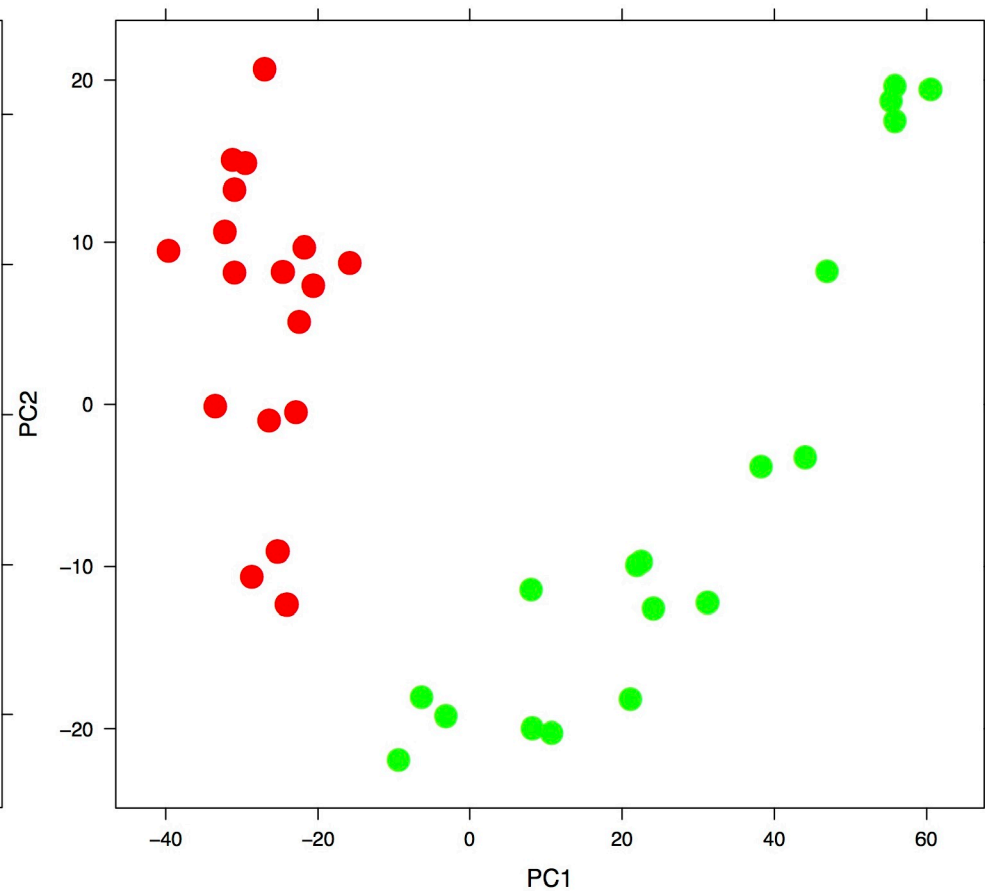

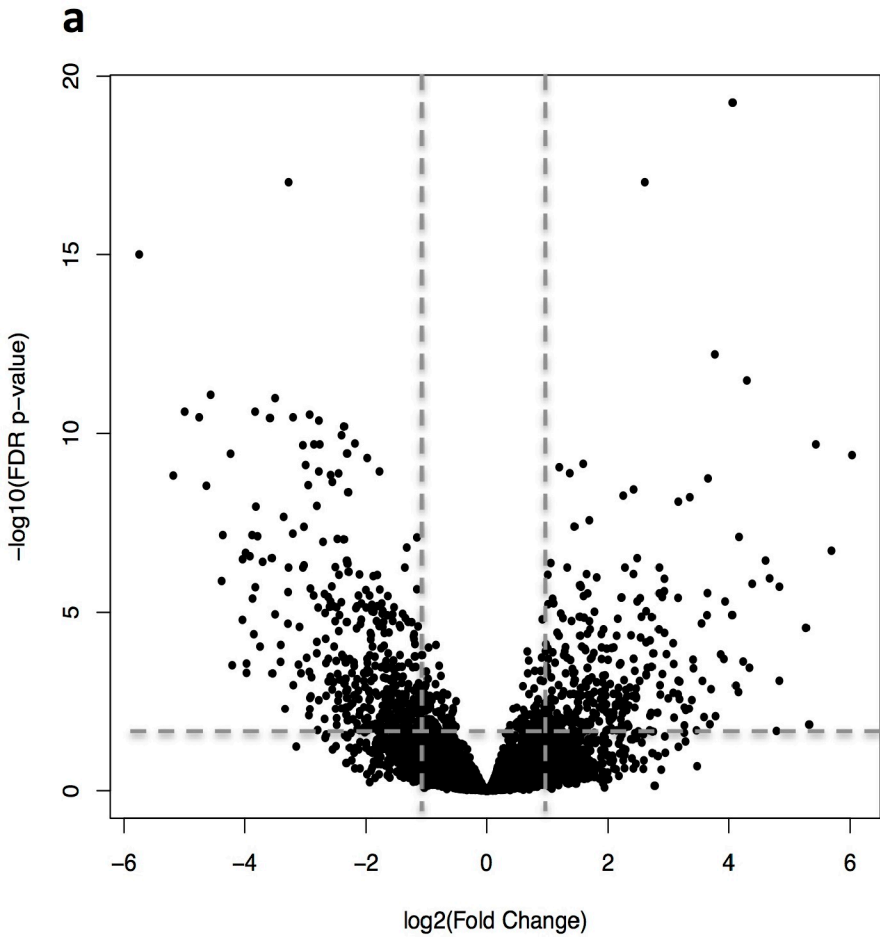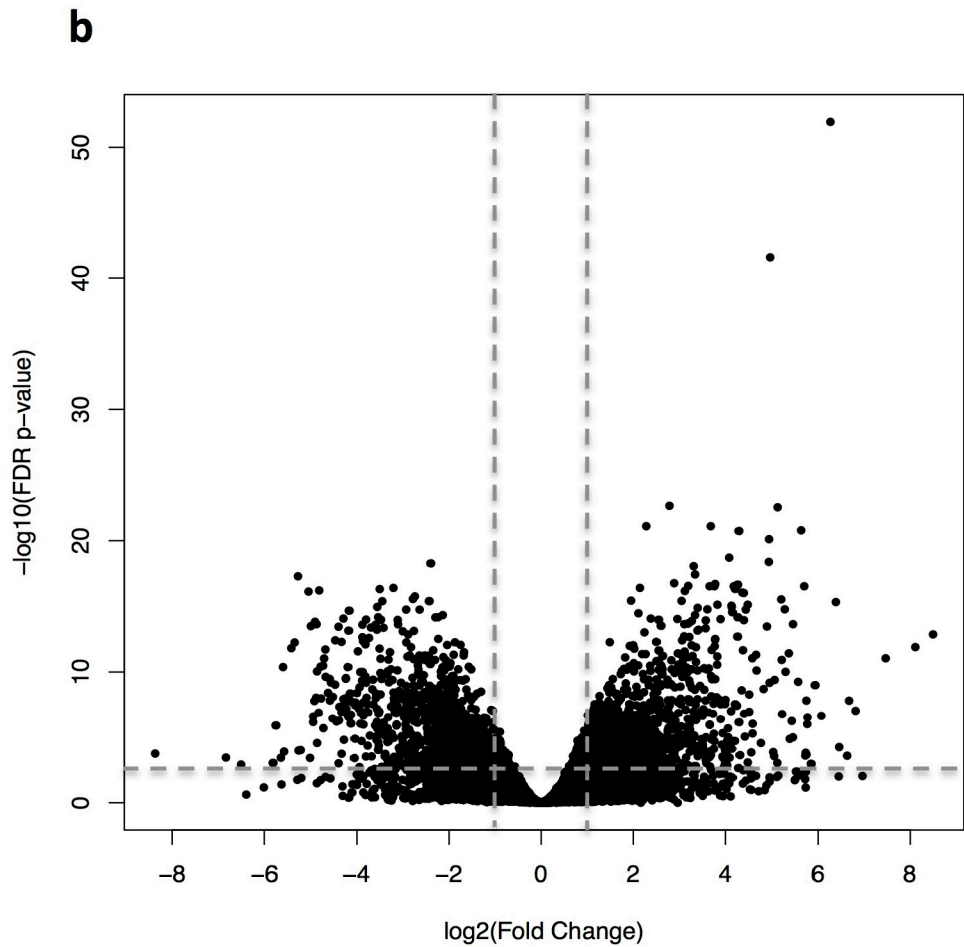

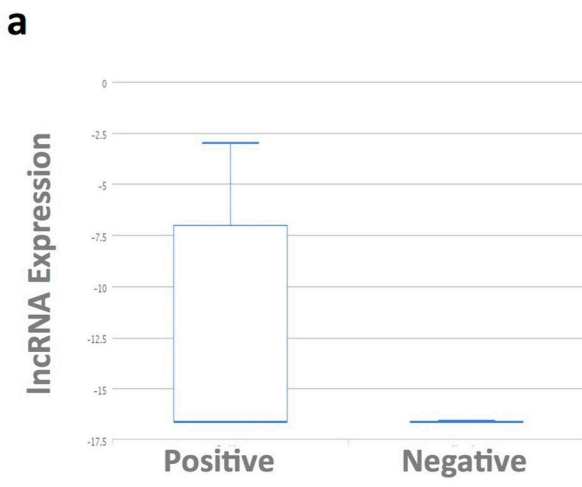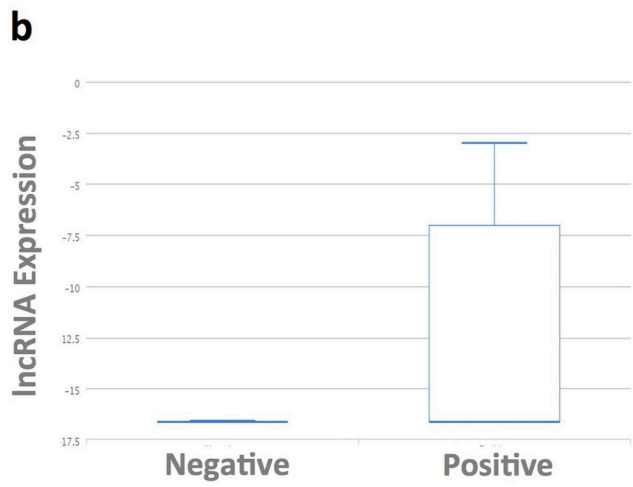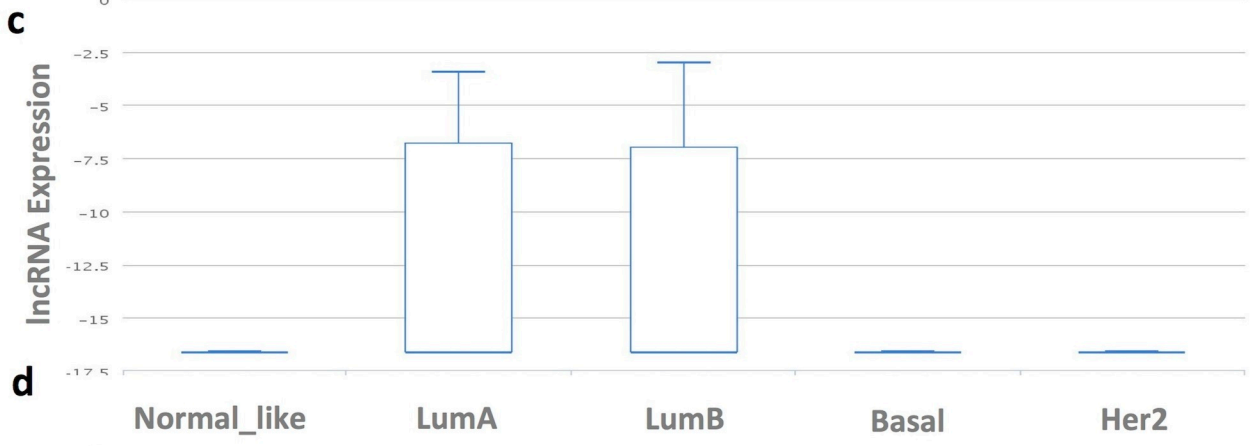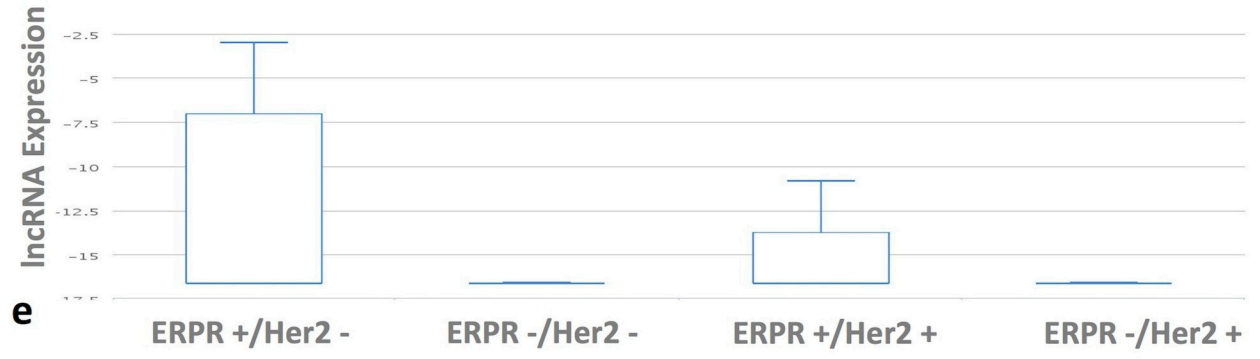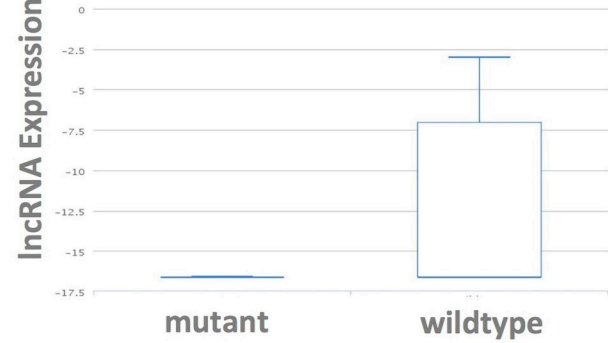

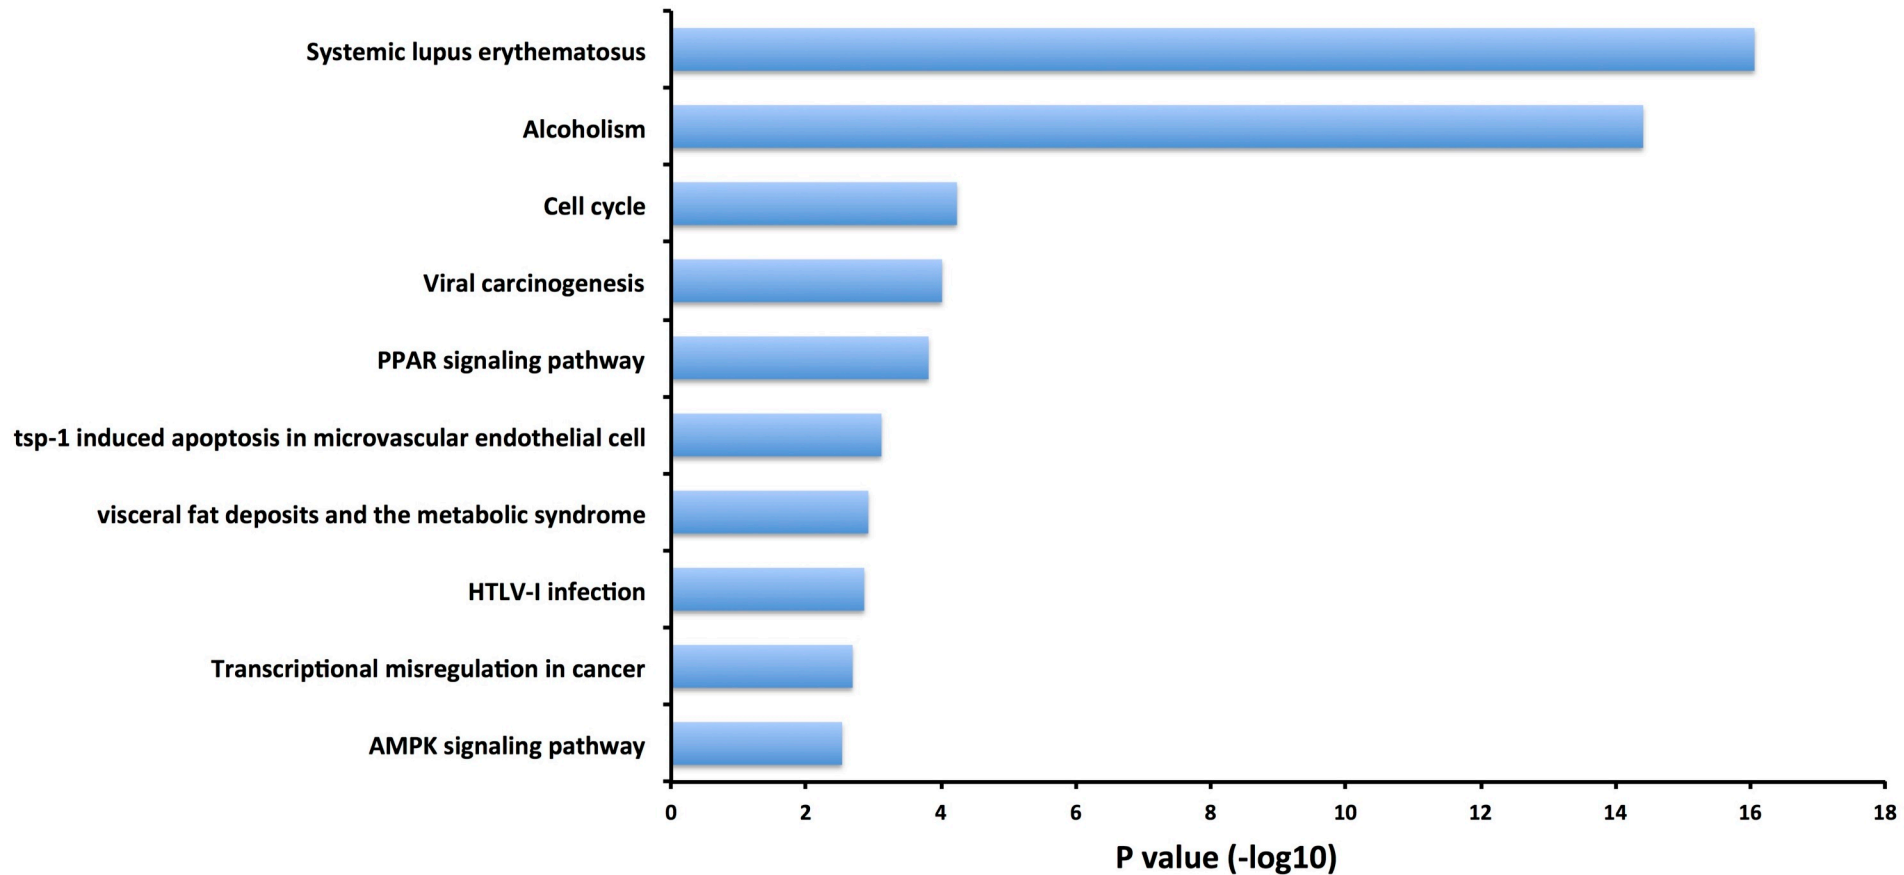

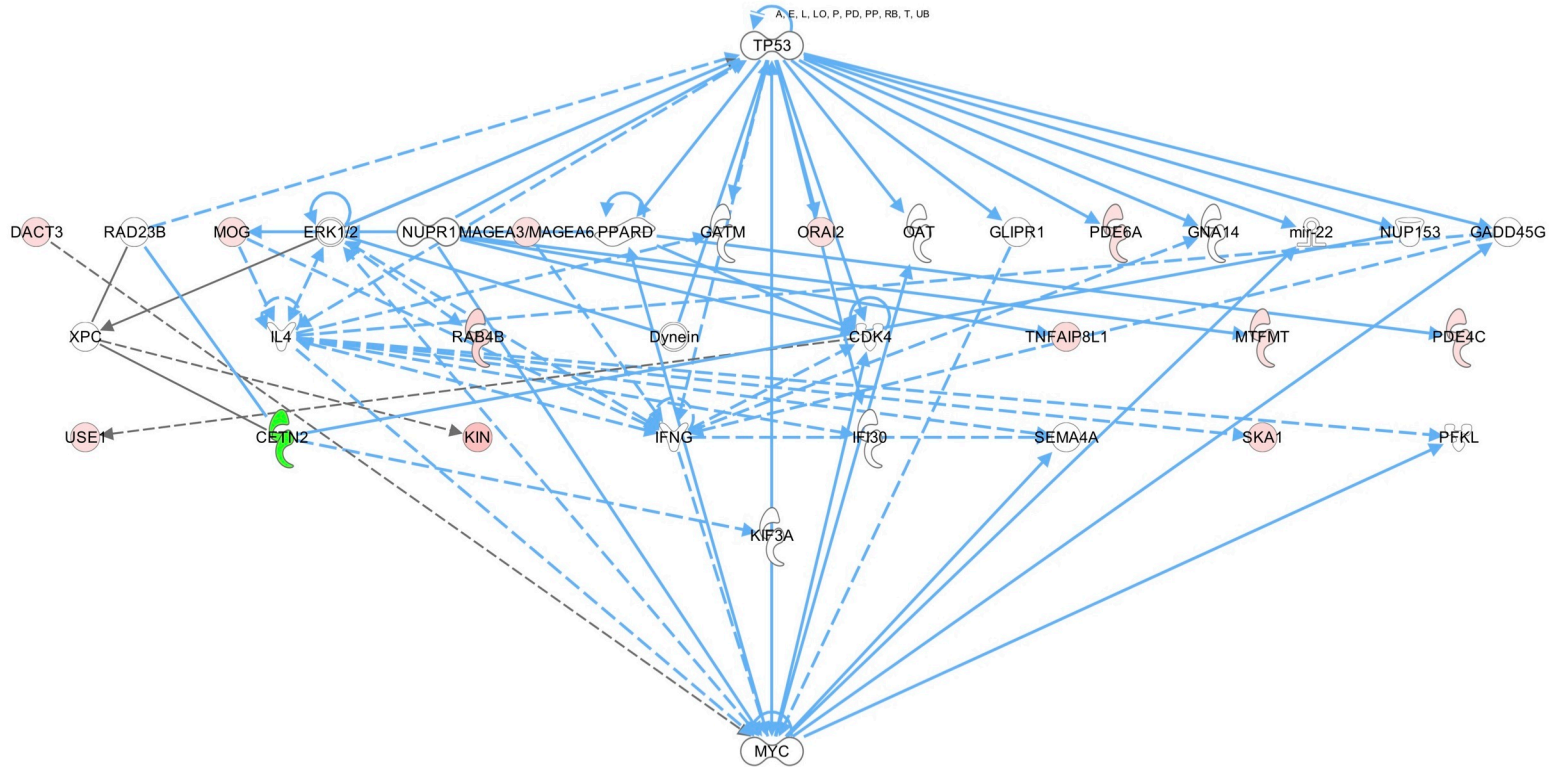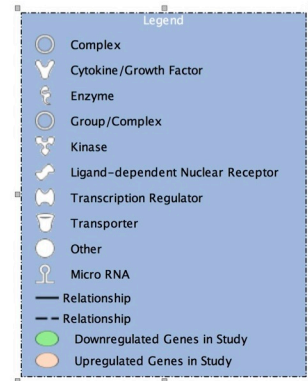

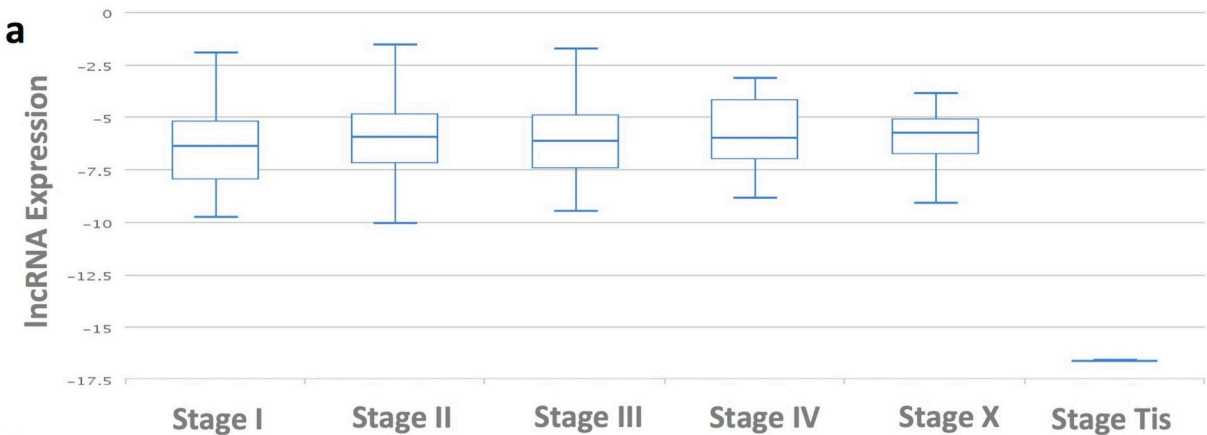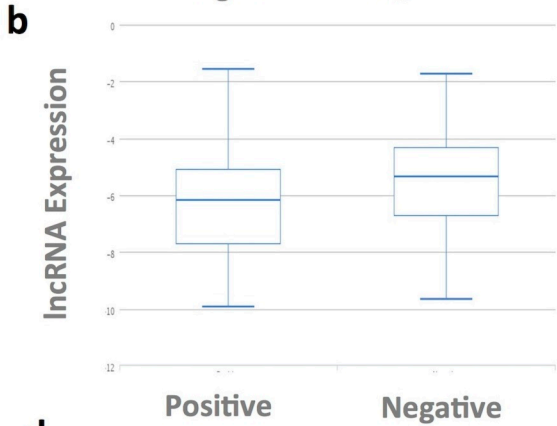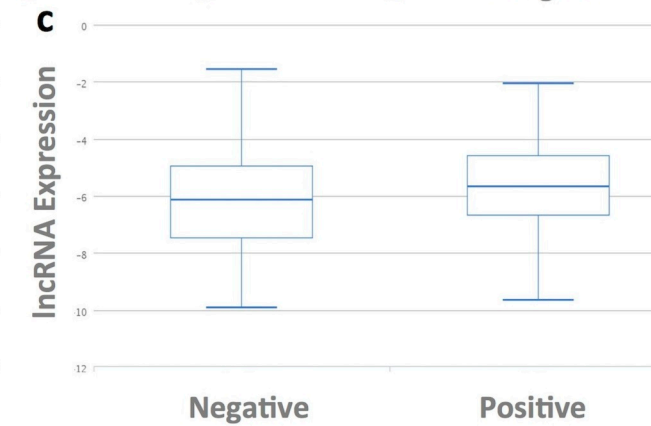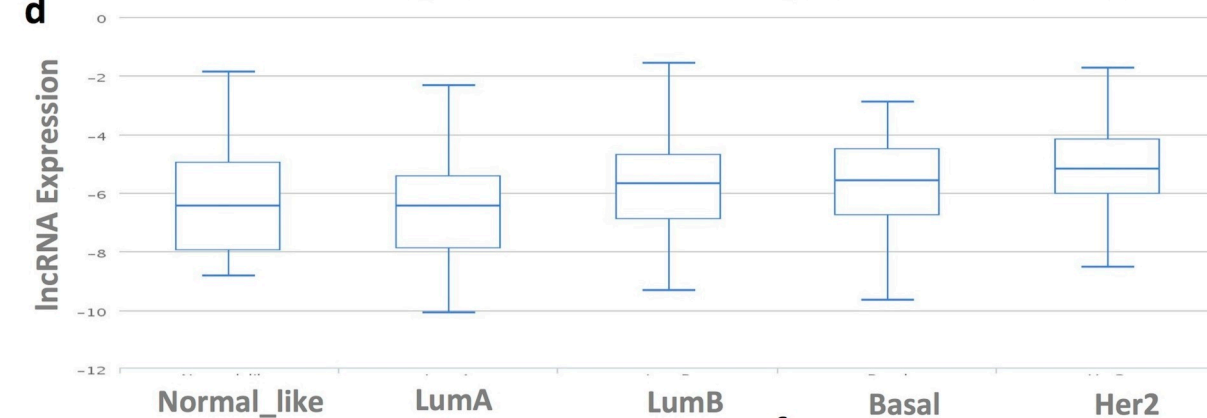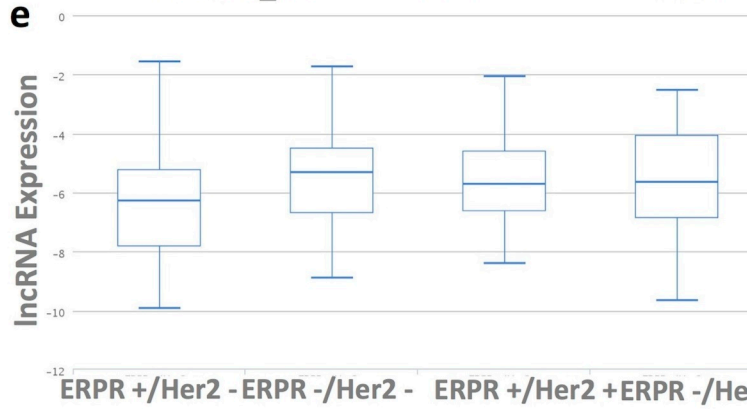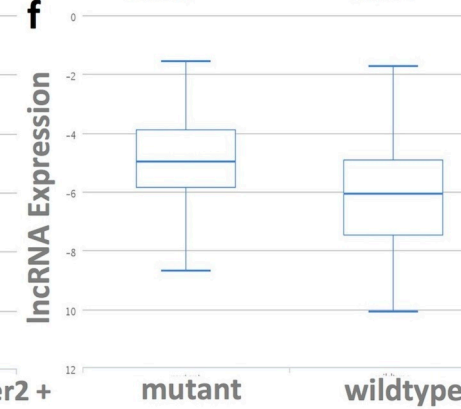



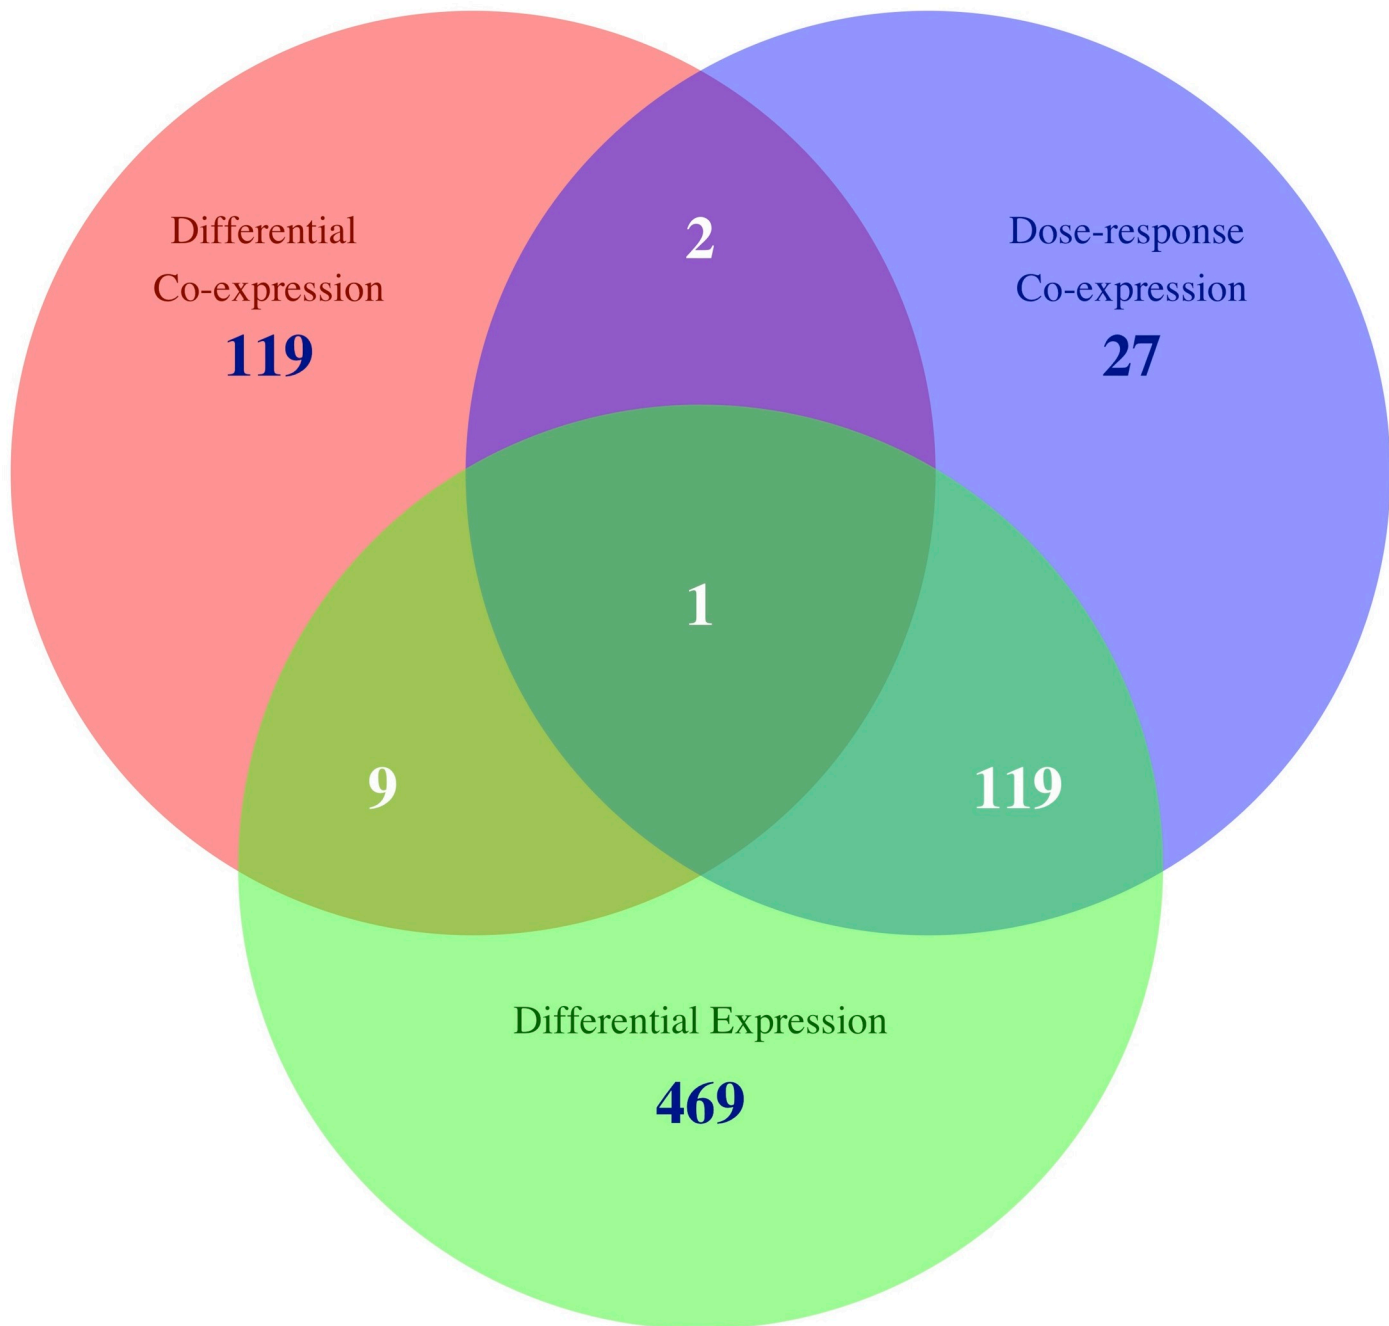

Differential  
Co-expression

**119**

**2**

Dose-response  
Co-expression

**27**

**1**

**9**

**119**

Differential Expression

**469**
